# Supplementary material for: V3S4/PPy nanocomposites with superior high-rate capability as sodium-ion battery anodes
Source: Royal Society of Chemistry journal article supplement (doi:10.1039/d3ta02402d), 2023-01-01
Supplement: d3ta02402d1.pdf [file d3ta02402d1.pdf]

## Supporting Information

### **V<sub>3</sub>S<sub>4</sub>/PPy nanocomposites with superior high-rate capability as sodium-ion battery anodes**

Yajuan Zhang<sup>a</sup>, Yue Li<sup>b</sup>, Guangzhen Zhao<sup>a</sup>, Lu Han<sup>a</sup>, Ting Lu<sup>b</sup>, Jinliang Li<sup>c\*</sup>, Guang Zhu<sup>a\*</sup>, Likun  
Pan<sup>b\*</sup>

<sup>a</sup>*Key Laboratory of Spin Electron and Nanomaterials of Anhui Higher Education Institutes, Suzhou University, Suzhou 234000, PR China.*

<sup>b</sup>*Shanghai Key Laboratory of Magnetic Resonance, School of Physics and Electronic Science, East China Normal University, Shanghai 200241, China.*

<sup>c</sup>*Siyuan Laboratory, Guangdong Provincial Key Laboratory of Nanophotonic Manipulation, Guangdong Provincial Engineering Technology Research Center of Vacuum Coating Technologies and New Energy Materials, Department of Physics, Jinan University, Guangzhou 510632, China*

\* *Corresponding author: lijnliang@email.jnu.edu.cn (J. Li); lkpan@phy.ecnu.edu.cn (Likun Pan); guangzhu@ahszu.edu.cn (Guang Zhu).*

## **Material characterizations**

The structures of the samples were characterized using various analytical techniques. X-ray diffraction (XRD) patterns were obtained using a D8 ADVANCE PC diffractometer (Bruker, Germany) with Cu/K $\alpha$  radiation ( $\lambda=0.15406$  nm). The morphologies of the samples were examined using a Zeiss Ultra 55 field-emission scanning electron microscope (SEM) and a JEOL-2010 transmission electron microscope (TEM). The specific surface areas and pore size distributions of the samples were determined using an Autosorb-iQ analyzer (Quantachrome, USA), and calculated based on the Brunauer-Emmett-Teller multipoint and Barret-Joyner-Halenda models, respectively. X-ray photoelectron spectroscopy (XPS) measurements were performed using a Kratos Axis Ultra instrument with monochromatic Al K $\alpha$  radiation. The X-ray absorption fine structure (XAFS) spectra were performed at BL11B beamline in SSRF. The beam current of the storage ring was 200 mA in a top-up mode. The V K-edge XAS spectra were recorded at room temperature in the transmission mode, with the ionization chambers filled with N<sub>2</sub>. The acquired XAFS data were analyzed by Athena and Artemis software according to the standard procedures.

## **Electrochemical tests**

To prepare the working electrodes, a homogeneous slurry was created by mixing the V<sub>3</sub>S<sub>4</sub>/PPy active material, Super P, and carboxymethyl cellulose (CMC) in deionized water, with a mass ratio of 6:2:2. This slurry was then coated onto a clean copper foil and dried under vacuum at 120 °C overnight, resulting in a mass loading of approximately 1.0 mg cm<sup>-2</sup> of active material on the working electrode. A thin Na plate was used as the counter electrode. The electrolyte consisted of 1 M NaClO<sub>4</sub> in a 1:1 w/w mixture of ethylene carbonate and propylene carbonate, with the addition of 5 wt.% fluoroethylene carbonate. The CR2032 coin cells were assembled in an argon-filled glove box with

H<sub>2</sub>O and O<sub>2</sub> levels both less than 0.1 ppm. Galvanostatic charge/discharge measurements were performed using a LAND CT2001A battery testing system at a current density of 100 mA g<sup>-1</sup> in the voltage range of 0.001-3 V, unless otherwise specified. Cyclic voltammetry (CV) curves were recorded using an Autolab electrochemical workstation in a voltage range of 0.001-3 V at a scan rate of 0.2 mV s<sup>-1</sup>, unless otherwise specified. Electrochemical impedance spectroscopy (EIS) data were measured using the same electrochemical workstation with a perturbation voltage of 5 mV in a frequency range of 0.1 Hz to 0.1 MHz.

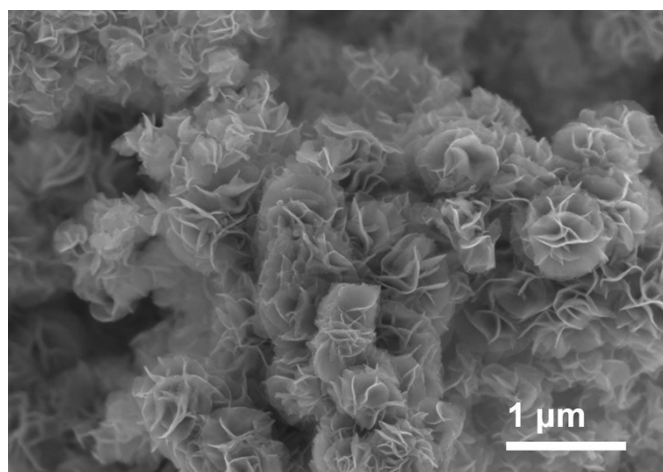

Fig. S1 SEM image of V<sub>3</sub>S<sub>4</sub>.

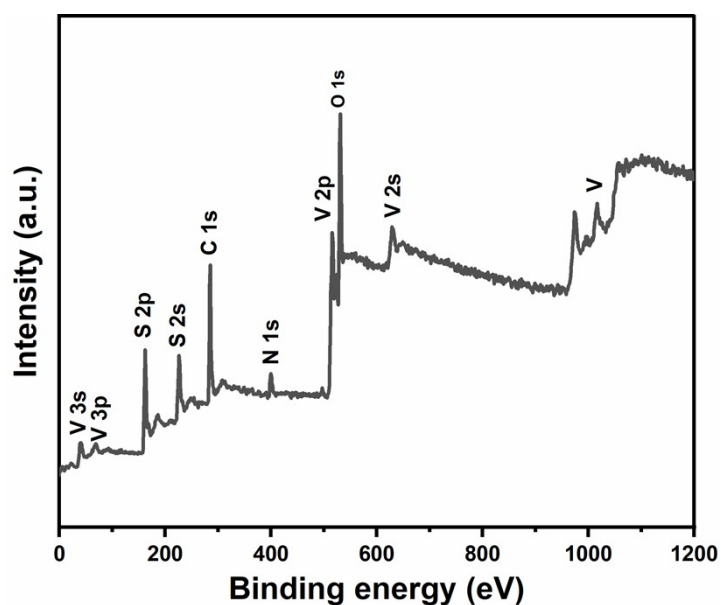

Fig. S2 XPS survey spectrum of VSP-1.

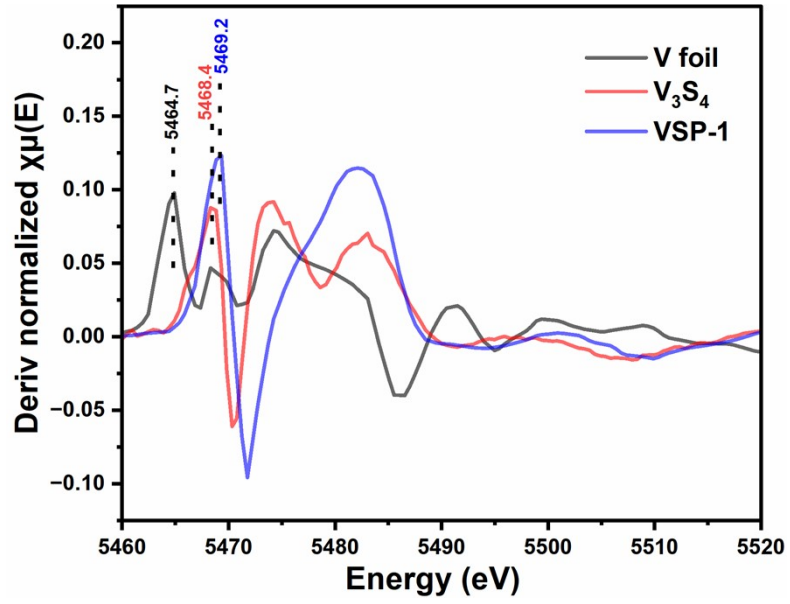

Fig. S3 (a) First-derivative XANES plots for V foil,  $V_3S_4$  and VSP-1 samples.

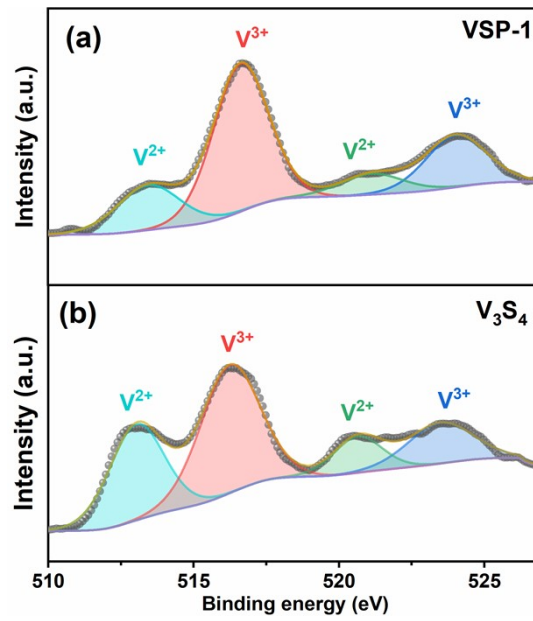

Fig. S4 The high resolution XPS spectra of  $V_3S_4$  and VSP-1 for V 2p.

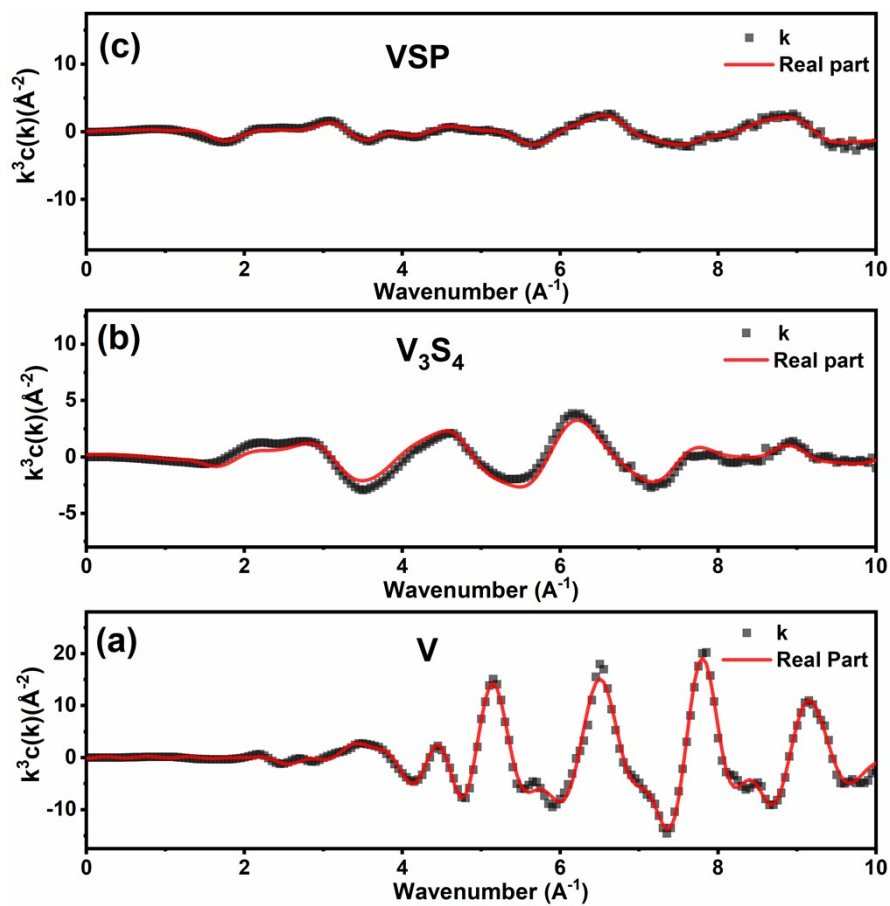

Fig. S5 EXAFS fitting curves of (a) V foil, (b)  $V_3S_4$ , and (c) VSP-1 at k space.

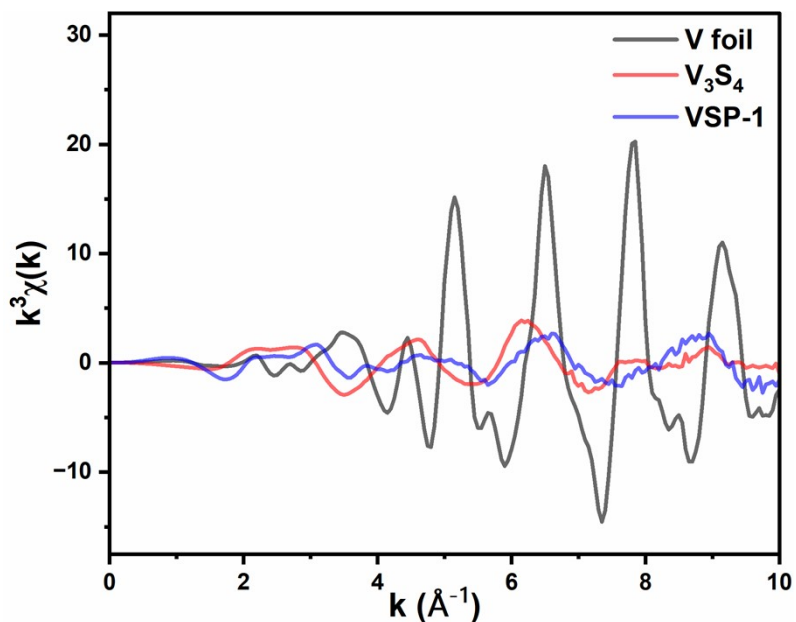

Fig. S6 V K-edge EXAFS curves shown in  $k^3$ -weighted k-space for V foil,  $V_3S_4$  and VSP-1 samples.

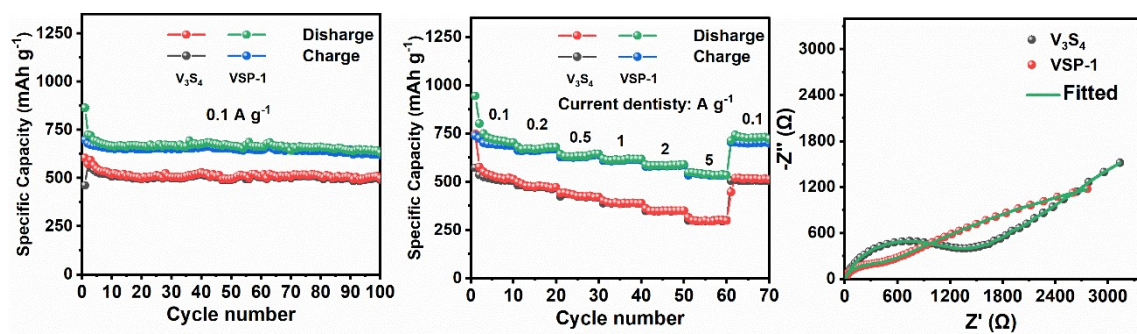

Fig. S7 Cycle performances (a), rate performance (b) and EIS spectra (c) of V<sub>3</sub>S<sub>4</sub> and VSP-1.

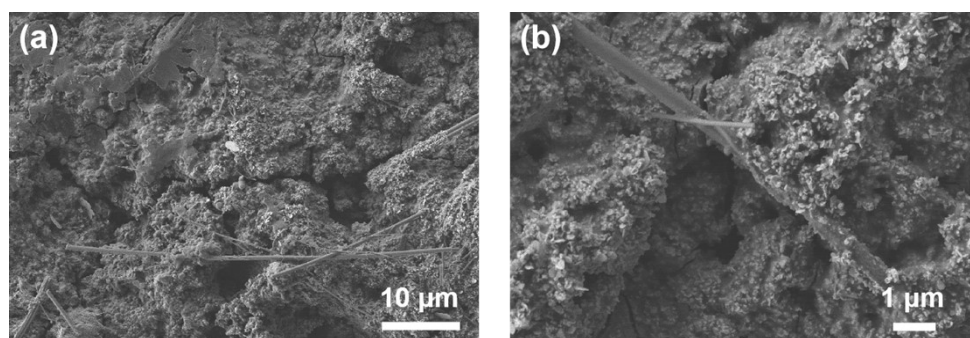

Fig. S8 The FESEM images of VSP-1 electrode after 100 cycles at 0.1 A g<sup>-1</sup>.

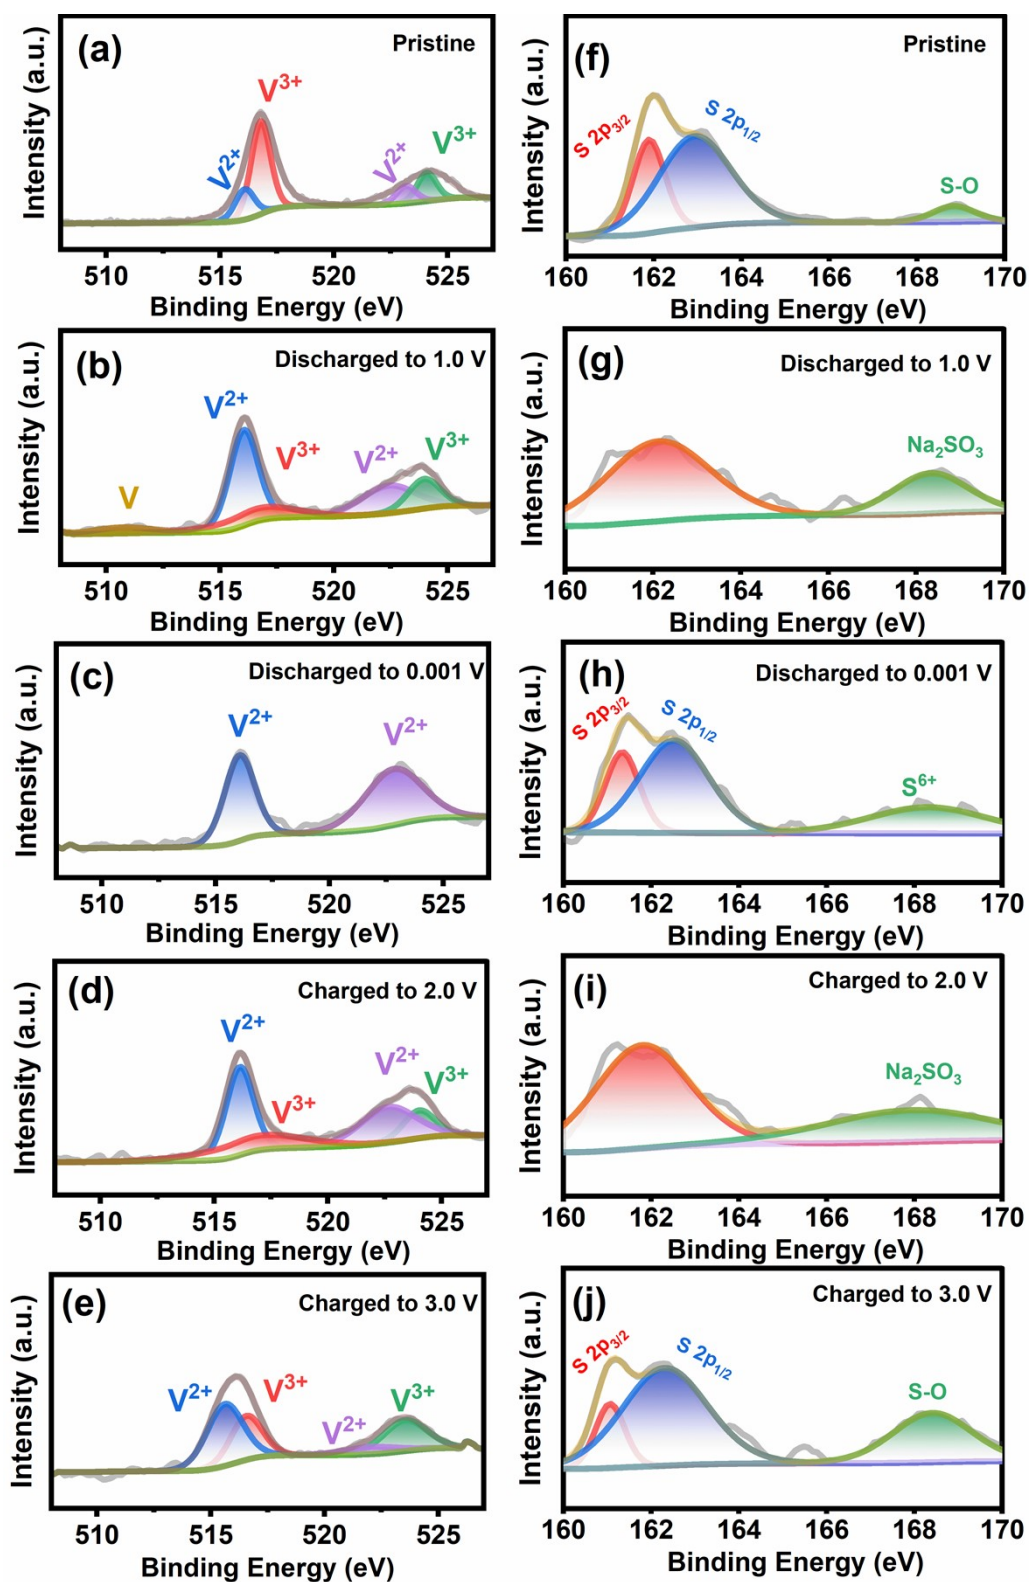

Fig. S9 Ex-situ XPS V 2P (a-e) and S 2p (f-j) spectra of VSP-1 in different insertion/extraction states corresponding to the voltage positions in Fig. 5a.



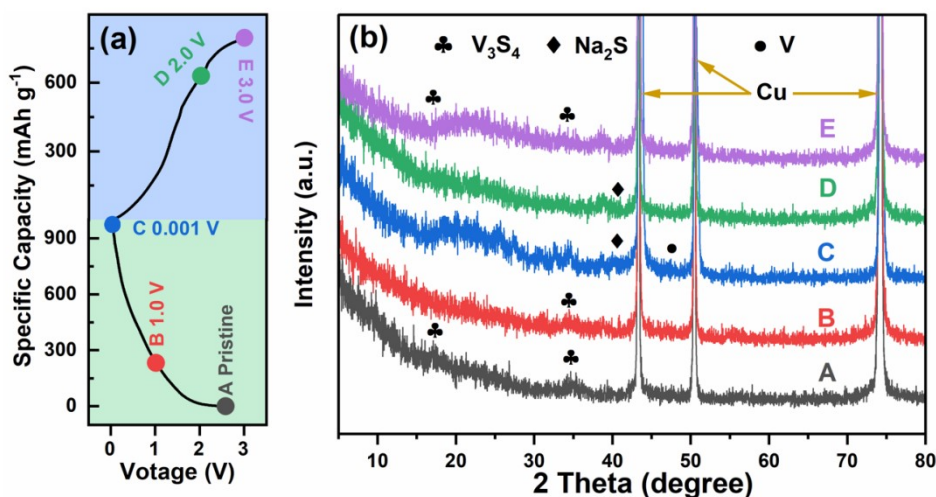

Fig. S10 Ex-situ XRD characterizations of the VSP-1 electrode: (a) discharge/charge curve and the corresponding voltage position, (b) XRD patterns at various states.

**Table S1** Pore parameters of VSP-0.5, VSP-1 and VSP-1.5.

| Sample  | Specific surface area (m <sup>2</sup> g <sup>-1</sup> ) | Pore Volume (cm <sup>3</sup> g <sup>-1</sup> ) |
|---------|---------------------------------------------------------|------------------------------------------------|
| VSP-0.5 | 127                                                     | 0.228                                          |
| VSP-1   | 239                                                     | 0.562                                          |
| VSP-1.5 | 49                                                      | 0.111                                          |

**Table S2** Comparison of the sodium-ion storage performances between V<sub>3</sub>S<sub>4</sub>/PPy in this work and vanadium sulfide-based materials reported in the literatures.

| Vanadium sulfide     | Initial              |                                                                   |                                                                                                  |      |
|----------------------|----------------------|-------------------------------------------------------------------|--------------------------------------------------------------------------------------------------|------|
|                      | Coulombic efficiency | Cycling stability                                                 | Rate capability                                                                                  | Ref. |
| VS <sub>2</sub> -rGO | 56%                  | 350 mAh g <sup>-1</sup> after 500 cycles at 0.1 A g <sup>-1</sup> | 220 mAh g <sup>-1</sup> at 1 A g <sup>-1</sup><br>143 mAh g <sup>-1</sup> at 2 A g <sup>-1</sup> | 1    |



|                                                                 |      |                                                                      |                                                                                                                                                       |   |
|-----------------------------------------------------------------|------|----------------------------------------------------------------------|-------------------------------------------------------------------------------------------------------------------------------------------------------|---|
| VOOH-VS <sub>2</sub><br>micro-flowers                           | 82%  | 330 mAh g <sup>-1</sup> after 150<br>cycles at 0.2 A g <sup>-1</sup> | 224 mAh g <sup>-1</sup> at 1 A g <sup>-1</sup><br>113 mAh g <sup>-1</sup> at 5 A g <sup>-1</sup>                                                      | 2 |
| VS <sub>4</sub> @rGO                                            | /    | 264 mAh g <sup>-1</sup> after 1000<br>cycles at 1 A g <sup>-1</sup>  | 176 mAh g <sup>-1</sup> at 5 A g <sup>-1</sup><br>114 mAh g <sup>-1</sup> at 10 A g <sup>-1</sup><br>220 mAh g <sup>-1</sup> at 0.5 A g <sup>-1</sup> | 3 |
| VS <sub>4</sub> -rGO                                            | ~75% | 237 mAh g <sup>-1</sup> after 50<br>cycles at 0.1 A g <sup>-1</sup>  | 1<br>192 mAh g <sup>-1</sup> at 0.8 A g <sup>-1</sup><br>1                                                                                            | 4 |
| VS <sub>4</sub> -rGO                                            | ~61% | 402 mAh g <sup>-1</sup> after 300<br>cycles at 0.5 A g <sup>-1</sup> | 340 mAh g <sup>-1</sup> at 2 A g <sup>-1</sup><br>238 mAh g <sup>-1</sup> at 5 A g <sup>-1</sup><br>400 mAh g <sup>-1</sup> at 0.5 A g <sup>-1</sup>  | 5 |
| VS <sub>4</sub> -rGO                                            | 65%  | 201 mAh g <sup>-1</sup> after 50<br>cycles at 0.1 A g <sup>-1</sup>  | 1<br>309 mAh g <sup>-1</sup> at 0.8 A g <sup>-1</sup><br>1<br>346 mAh g <sup>-1</sup> at 1.2 A g <sup>-1</sup>                                        | 6 |
| VS <sub>4</sub> -rGO                                            | 71%  | 463 mAh g <sup>-1</sup> after 100<br>cycles at 0.1 A g <sup>-1</sup> | 1<br>270 mAh g <sup>-1</sup> at 2.4 A g <sup>-1</sup><br>1                                                                                            | 7 |
| VS <sub>4</sub> @ Ti <sub>3</sub> C <sub>2</sub> T <sub>x</sub> | 81%  | 599 mAh g <sup>-1</sup> after 40<br>cycles at 1 A g <sup>-1</sup>    | /                                                                                                                                                     | 8 |
| VS <sub>4</sub> @<br>polydopamine                               | 79%  | /                                                                    | 210 mAh g <sup>-1</sup> at 2 A g <sup>-1</sup><br>173 mAh g <sup>-1</sup> at 5 A g <sup>-1</sup>                                                      | 9 |

|                                         |     |                                    |                                                |    |
|-----------------------------------------|-----|------------------------------------|------------------------------------------------|----|
| VS <sub>4</sub> /carbon                 |     |                                    | 382 mAh g <sup>-1</sup> at 2 A g <sup>-1</sup> |    |
| nanotube                                | 81% | /                                  | 368 mAh g <sup>-1</sup> at 5 A g <sup>-1</sup> | 10 |
| N-doped carbon                          |     | 430 mAh g <sup>-1</sup> after 2000 | 500 mAh g <sup>-1</sup> at 2 A g <sup>-1</sup> |    |
| nanotube@VS <sub>4</sub>                | 82% | cycles at 1 A g <sup>-1</sup>      | 460 mAh g <sup>-1</sup> at 5 A g <sup>-1</sup> | 11 |
| V <sub>5</sub> S <sub>8</sub> /carbon   |     | 462 mAh g <sup>-1</sup> after 70   | 418 mAh g <sup>-1</sup> at 1 A g <sup>-1</sup> |    |
| fiber                                   | 49% | cycles at 0.2 A g <sup>-1</sup>    | 352 mAh g <sup>-1</sup> at 2 A g <sup>-1</sup> | 12 |
| V <sub>5</sub> S <sub>8</sub> /carbon   |     | 351 mAh g <sup>-1</sup> after 400  | 210 mAh g <sup>-1</sup> at 2 A g <sup>-1</sup> |    |
| fiber                                   | 57% | cycles at 0.2 A g <sup>-1</sup>    | 126 mAh g <sup>-1</sup> at 5 A g <sup>-1</sup> | 13 |
| V <sub>5</sub> S <sub>8</sub> -graphite |     | 488 mAh g <sup>-1</sup> after 500  | 584 mAh g <sup>-1</sup> at 1 A g <sup>-1</sup> |    |
|                                         | 68% | cycles at 1 A g <sup>-1</sup>      | 389 mAh g <sup>-1</sup> at 5 A g <sup>-1</sup> | 14 |
| V <sub>5</sub> S <sub>8</sub> @Graphene |     | 477 mAh g <sup>-1</sup> after 100  | 487 mAh g <sup>-1</sup> at 2 A g <sup>-1</sup> |    |
|                                         | /   | cycles at 1 A g <sup>-1</sup>      | 432 mAh g <sup>-1</sup> at 5 A g <sup>-1</sup> | 15 |
| carbon-coated                           |     |                                    | 561 mAh g <sup>-1</sup> at 1 A g <sup>-1</sup> |    |
| V <sub>2</sub> S <sub>3</sub>           | 91% | /                                  | 484 mAh g <sup>-1</sup> at 2 A g <sup>-1</sup> | 16 |
| V <sub>3</sub> S <sub>4</sub> @C        |     | 578 mAh g <sup>-1</sup> after 100  | 393 mAh g <sup>-1</sup> at 1 A g <sup>-1</sup> |    |
| nanosheets                              | 40% | cycles at 0.1 A g <sup>-1</sup>    |                                                | 17 |
| V <sub>3</sub> S <sub>4</sub> @rGO      |     | 531 mAh g <sup>-1</sup> after 200  | 287 mAh g <sup>-1</sup> at 1 A g <sup>-1</sup> |    |
|                                         | /   | cycles at 0.1 A g <sup>-1</sup>    | 232 mAh g <sup>-1</sup> at 2 A g <sup>-1</sup> | 18 |
| V <sub>3</sub> S <sub>4</sub> @NC       |     | 166 mAh g <sup>-1</sup> after 300  | 307 mAh g <sup>-1</sup> at 2 A g <sup>-1</sup> |    |
|                                         | /   | cycles at 10 A g <sup>-1</sup>     | 249 mAh g <sup>-1</sup> at 5 A g <sup>-1</sup> | 19 |
| V <sub>3</sub> S <sub>4</sub> @ carbon  |     | 400 mAh g <sup>-1</sup> after 400  | 265 mAh g <sup>-1</sup> at 2 A g <sup>-1</sup> |    |
| nanofibers                              | 57% | cycles at 0.1 A g <sup>-1</sup>    | 200 mAh g <sup>-1</sup> at 5 A g <sup>-1</sup> | 20 |

---

|                                    |     |                                                                   |                                                |           |
|------------------------------------|-----|-------------------------------------------------------------------|------------------------------------------------|-----------|
|                                    |     |                                                                   | 611 mAh g <sup>-1</sup> at 1 A g <sup>-1</sup> |           |
| V <sub>3</sub> S <sub>4</sub> /PPy | 79% | 619 mAh g <sup>-1</sup> after 100 cycles at 0.1 A g <sup>-1</sup> | 585 mAh g <sup>-1</sup> at 2 A g <sup>-1</sup> | This work |
|                                    |     |                                                                   | 535 mAh g <sup>-1</sup> at 5 A g <sup>-1</sup> |           |

---

## Reference

1. H. Qi, L. Wang, T. Zuo, S. Deng, Q. Li, Z. H. Liu, P. Hu and X. He, *ChemElectroChem*, 2019, **7**, 78-85.
2. W. Li, J. Huang, L. Feng, L. Cao, Y. Feng, H. Wang, J. Li and C. Yao, *J. Mater. Chem. A*, 2017, **5**, 20217-20227.
3. W. Li, J. Zhang, J. Huang, J. Wang and X. Li, *Mater. Lett.*, 2023, **330**, 133301.
4. R. Sun, Q. Wei, Q. Li, W. Luo, Q. An, J. Sheng, D. Wang, W. Chen and L. Mai, *ACS Appl. Mater. Interfaces*, 2015, **7**, 20902-20908.
5. S. Wang, F. Gong, S. Yang, J. Liao, M. Wu, Z. Xu, C. Chen, X. Yang, F. Zhao, B. Wang, Y. Wang and X. Sun, *Adv. Funct. Mater.*, 2018, **28**, 1801806.
6. L. Zhu, Y. Li, J. Wang and X. Zhu, *Solid State Ionics*, 2018, **327**, 129-135.
7. S. Li, W. He, P. Deng, J. Cui and B. Qu, *Mater. Lett.*, 2017, **205**, 52-55.
8. H. Wang, P. Wang, W. Gan, L. Ci, D. Li and Q. Yuan, *J. Power Sources*, 2022, **534**, 231412.
9. Y. Liu, R. Huang, N. Wei and Y. Zhou, *Ionics*, 2023, **29**, 651-660.
10. P. Yu, S. Xu, K. Yao, H. Yao, W. Yang, X. Lin, H. Yu, W. Liu, Y. Qin and X. Rui, *J. Power Sources*, 2021, **501**, 230021.
11. F. Yang, W. Zhong, M. Ren, W. Liu, M. Li, G. Li and L. Su, *Inorg. Chem. Front.*, 2020, **7**, 4883-4891.

12. L. Xu, X. Chen, W. Guo, L. Zeng, T. Yang, P. Xiong, Q. Chen, J. Zhang, M. Wei and Q. Qian, *Nanoscale*, 2021, **13**, 5033-5044.
13. S. Liu, H. Zhang, M. Zhou, X. Chen, Y. Sun and Y. Zhang, *J. Electroanal. Chem.*, 2021, **903**, 115841.
14. C. Yang, X. Ou, X. Xiong, F. Zheng, R. Hu, Y. Chen, M. Liu and K. Huang, *Energy Environ. Sci.*, 2017, **10**, 107-113.
15. L. B. Tang, P. Y. Li, R. D. Cui, T. Peng, H. X. Wei, Z. Y. Wang, H. Y. Wang, C. Yan, J. Mao, K. H. Dai, H. Z. Chen, X. H. Zhang and J. C. Zheng, *Small Methods*, 2023, **7**, 2201387.
16. L. Shen, Y. Wang, F. Wu, I. Moudrakovski, P. A. van Aken, J. Maier and Y. Yu, *Angew. Chem. Int. Ed.*, 2019, **58**, 7238-7243.
17. Y. Liu, Z. Sun, X. Sun, Y. Lin, K. Tan, J. Sun, L. Liang, L. Hou and C. Yuan, *Angew. Chem. Int. Ed.*, 2020, **59**, 2473-2482.
18. H. Zhang, Y. Zhang, Y. Meng, M. Xiao, J. Hu, G. Zhao, S. Liu and F. Zhu, *Ionics*, 2021, **27**, 5067-5077.
19. Z. Huang, P. Luo, H. Zheng, Z. Lyu and X. Ma, *J. Phys. Chem. Solid.*, 2023, **172**, 111081.
20. G. Yao, P. Niu, Z. Li, Y. Xu, L. Wei, H. Niu, Y. Yang, F. Zheng and Q. Chen, *Chem. Eng. J.*, 2021, **423**, 130229.
